# Supplementary material for: Breast and ovarian cancer penetrance of BRCA1/2 mutations among Hong Kong women
Source: PubMed Central journal article supplement (PMC5982775; doi:10.18632/oncotarget.24382), 2018-02-02
Supplement: oncotarget-09-25025-s001.pdf [file oncotarget-09-25025-s001.pdf]

# Breast and ovarian cancer penetrance of *BRCA1/2* mutations among Hong Kong women

## SUPPLEMENTARY MATERIALS

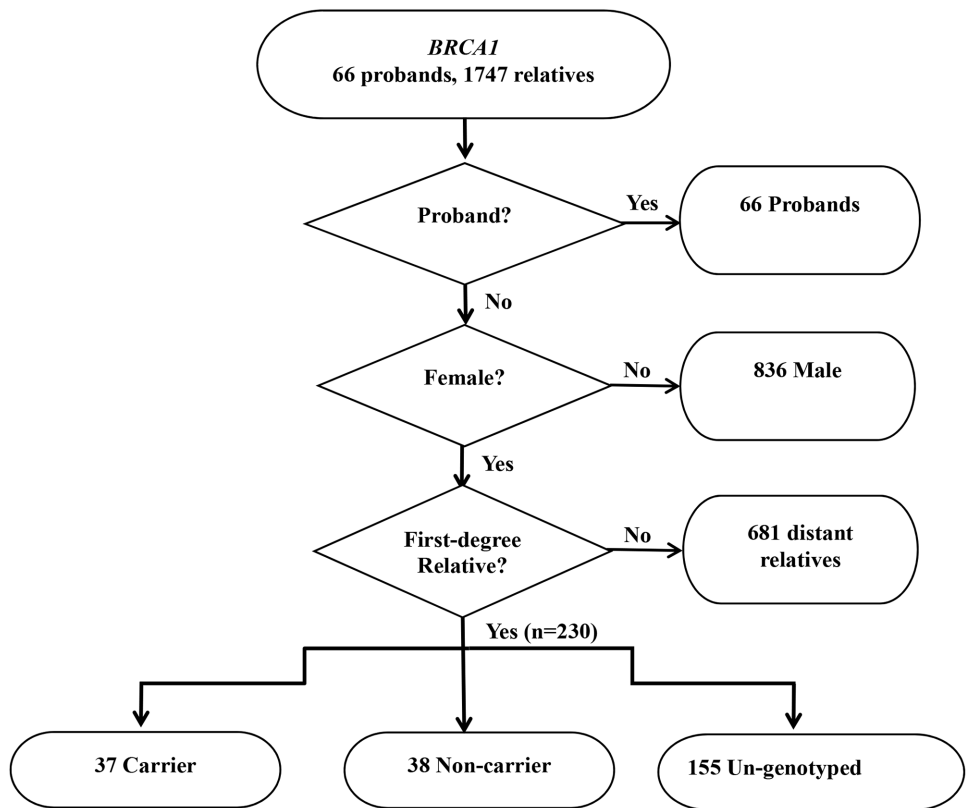

Supplementary Figure 1: Description of 66 *BRCA1* families.

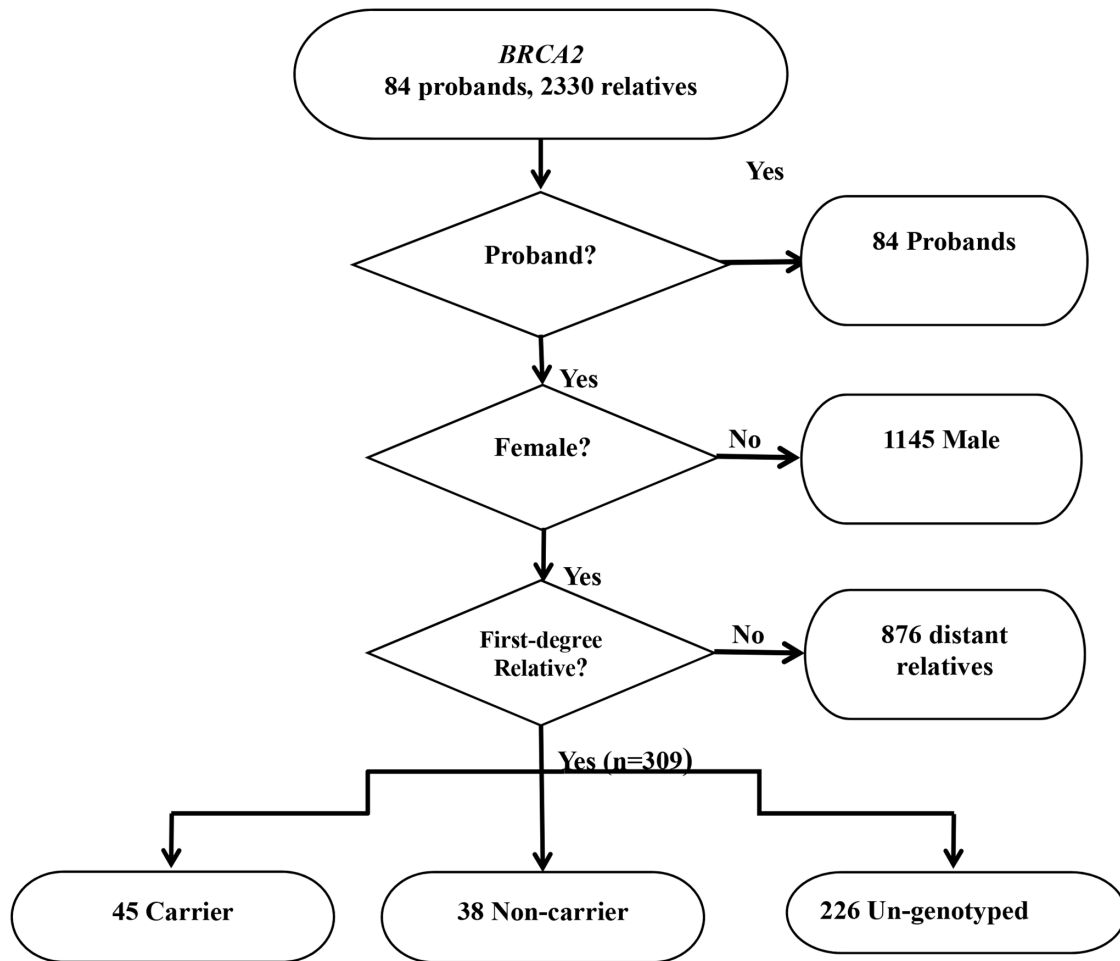

Supplementary Figure 2: Description of 84 *BRCA2* families.

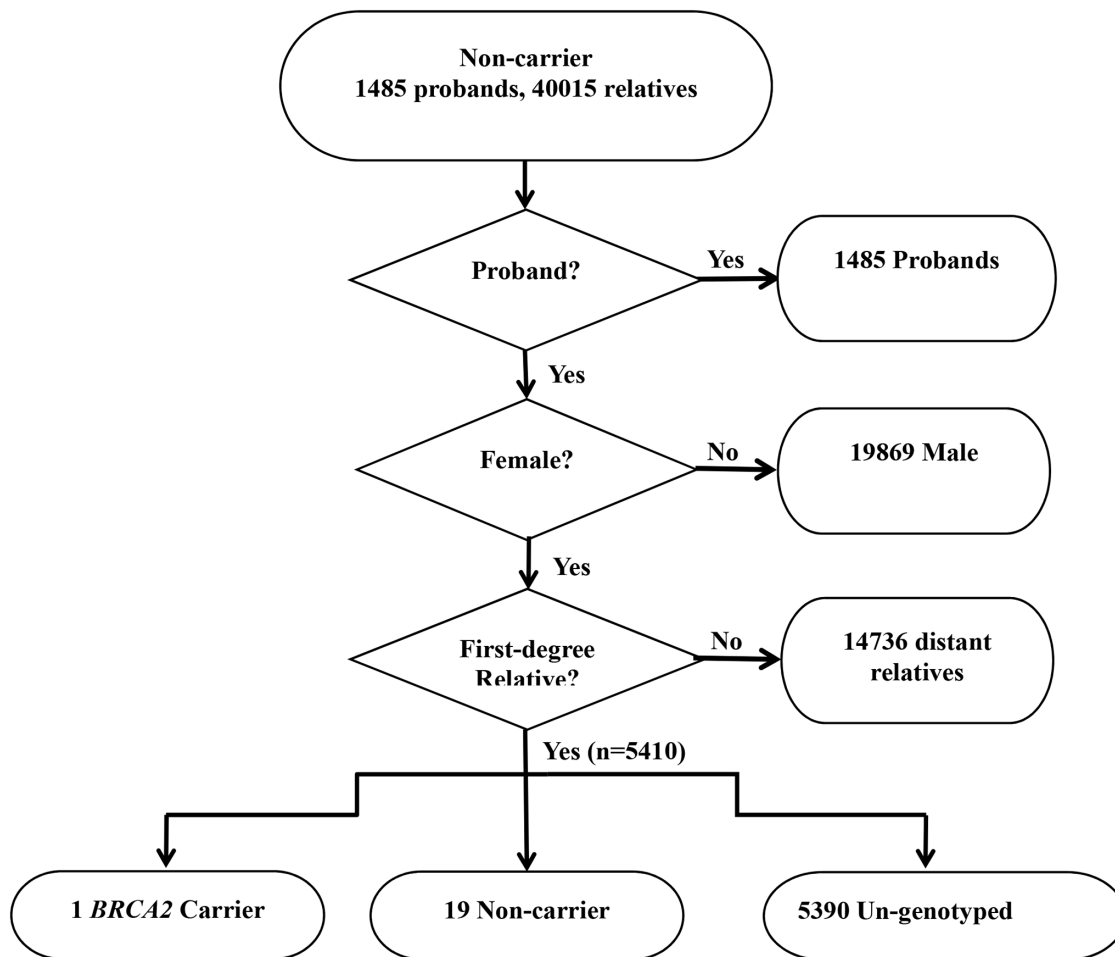

Supplementary Figure 3: Description of 1485 non-carrier families.

Supplementary Table 1: Characteristics of Korean, Beijing, and Hong Kong Studies

| Study              | Population                                                 | Ascertainment             | No. of Families <sup>1</sup> | No. of Carriers <sup>2</sup>             | Genotyping Method             | Estimation Approach                                                               | Necessary Condition for Unbiasedness                                                                                        |
|--------------------|------------------------------------------------------------|---------------------------|------------------------------|------------------------------------------|-------------------------------|-----------------------------------------------------------------------------------|-----------------------------------------------------------------------------------------------------------------------------|
| <b>Korea [10]</b>  | Korean Hereditary Breast Cancer Study                      | Population based patients | 151+225+0                    | 67+160                                   | F-CSGE or DHPLC or Sequencing | Modified segregation analyses based on mutation-carrying families                 | No additional familial aggregation other than <i>BRCA1/2</i>                                                                |
| <b>Beijing [9]</b> | Breast Center, Peking University Cancer Hospital           | Population based patients | 70+55+1691                   | Participants were ungenotyped            | Sequencing                    | Kin-cohort design based on first-degree relatives                                 | Conditional on cancer status, the probands are representative; No additional familial aggregation other than <i>BRCA1/2</i> |
| <b>Hong Kong</b>   | Hong Kong Hereditary and High Risk Breast Cancer Programme | Population based patients | 66+84+1485                   | Only part of participants were genotyped | Sequencing and MLPA           | Marginal likelihood approach of Kin-cohort design based on first-degree relatives | Conditional on cancer status, the probands are representative; No additional familial aggregation other than <i>BRCA1/2</i> |

<sup>1</sup> In the form of No. of *BRCA1* carrier families + *BRCA2* carrier families + non-carrier families.

<sup>2</sup> In the form of No. of *BRCA1* carriers + *BRCA2* carriers.

MLPA, multiplex ligation-dependent probe amplification (MLPA); F-CSGE, fluorescence-based conformation-sensitive gel electrophoresis; DHPLC, Denaturing high-performance liquid chromatography.
